# Supplementary material
Source: HighWire-hosted journal article supplement (https://erj.ersjournals.com/content/59/3/2100866)
Supplement: inline-supplementary-material-11 [file inline-supplementary-material-11.pdf]

**Supplementary table S3.** Trim and fill analysis for correction of small study effect. The table indicates the corrected SMD, confidence interval and  $I^2$  after trim and fill analysis. All SMD remain significant after correction.

|        | Number of missing studies | Total number of studies | SMD   | CI inf | CI sup | $I^2$ |
|--------|---------------------------|-------------------------|-------|--------|--------|-------|
| MAP    | 24                        | 136                     | 0.98  | 0.73   | 1.24   | 86%   |
| RVD    | 0                         | 16                      | -1.62 | -2.71  | -0.54  | 91%   |
| IMT    | 0                         | 28                      | 0.94  | 0.51   | 1.37   | 77%   |
| LESION | 6                         | 31                      | 0.87  | 0.6    | 1.14   | 50%   |
