# Supplementary material
Source: HighWire-hosted journal article supplement (https://erj.ersjournals.com/content/59/3/2100866)

Supplementary Figure 1

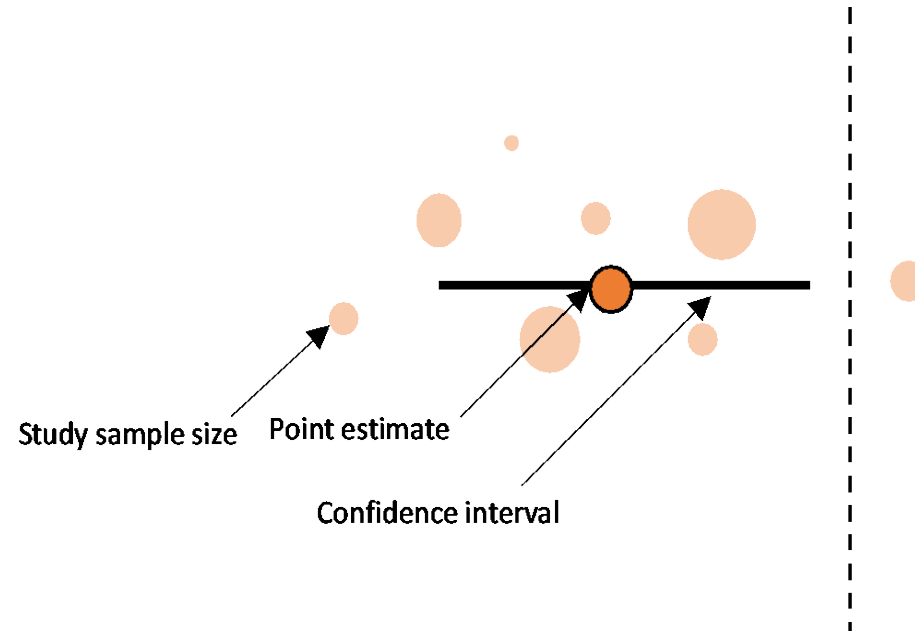

Supplement: inline-supplementary-material-1 [file inline-supplementary-material-1.pdf]

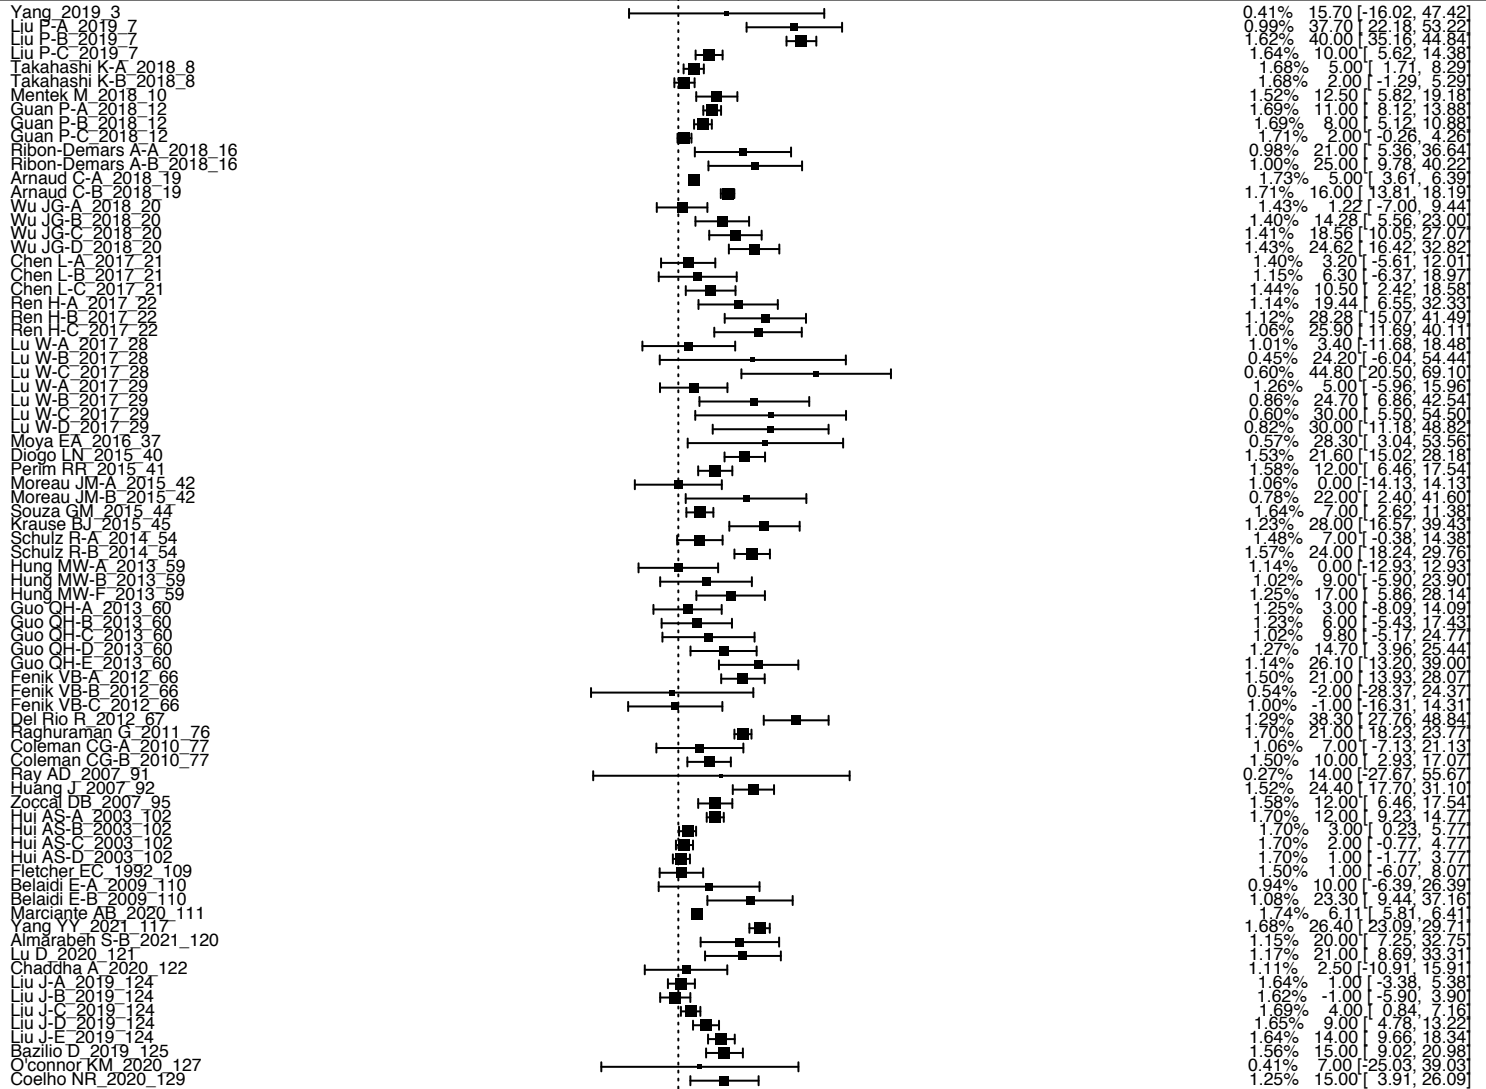

RE Model 100.00% 13.13 [ 10.80, 15.47]

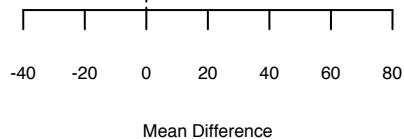

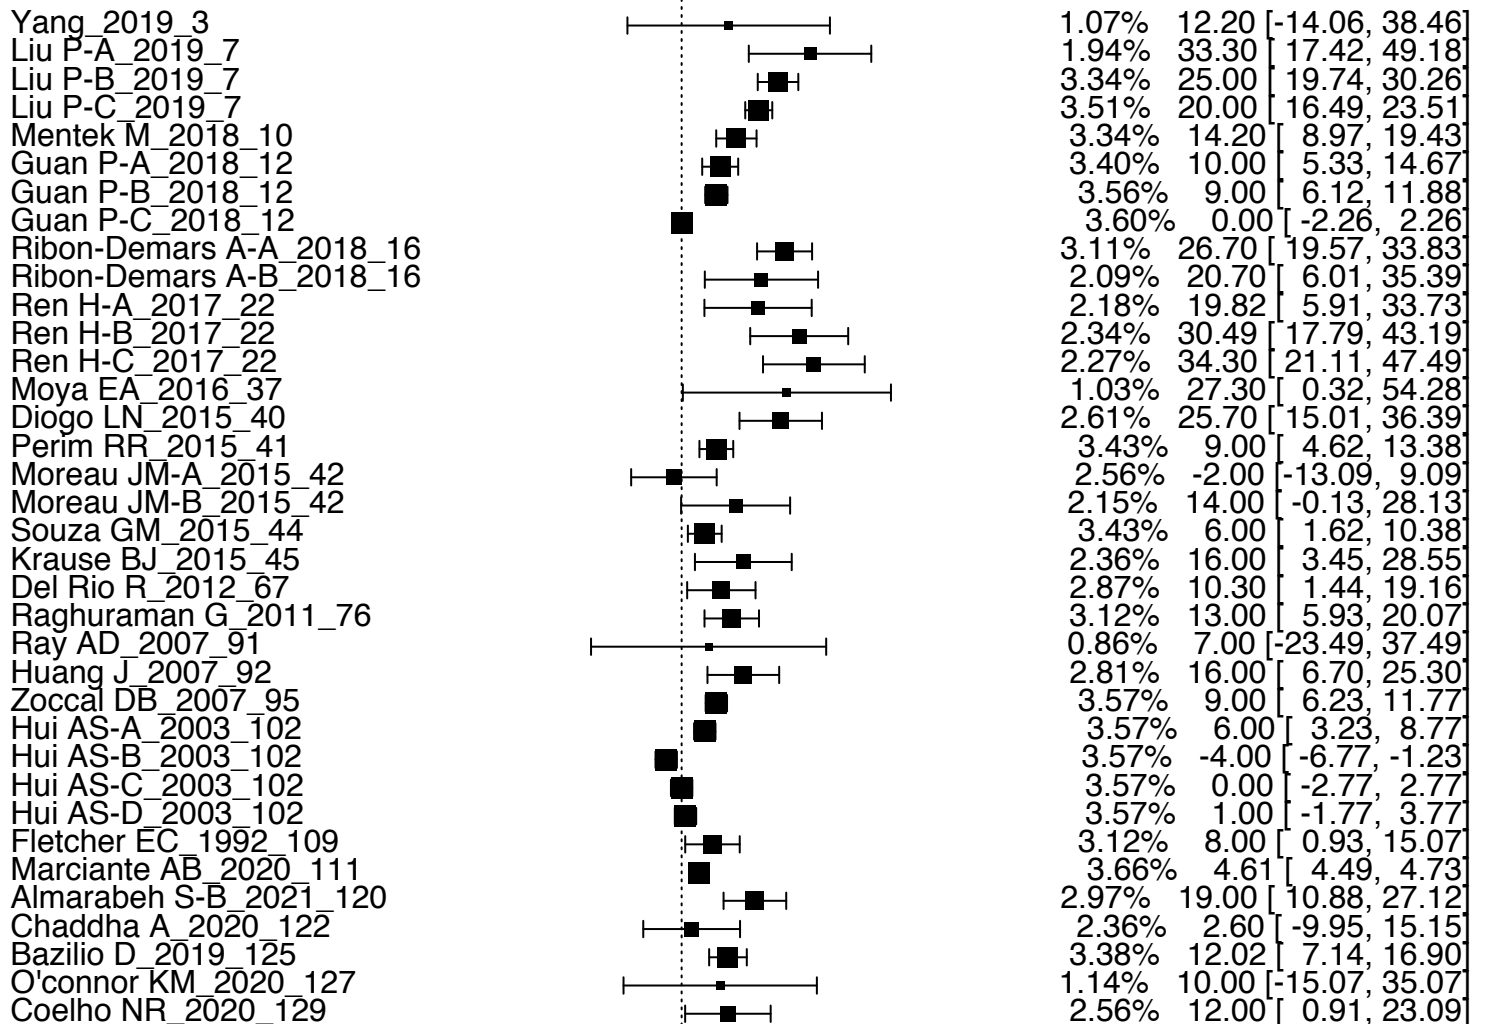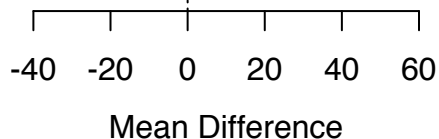

Supplement: inline-supplementary-material-3 [file inline-supplementary-material-3.pdf]
